# Supplementary material for: Impact and cost-effectiveness of snail control to achieve disease control targets for schistosomiasis
Source: PubMed Central journal article supplement — Proc Natl Acad Sci U S A. 2018 Jan 4;115(4):E584–91. doi: 10.1073/pnas.1708729114 (PMC5789907; doi:10.1073/pnas.1708729114), 2018-01-04
Supplement: pnas.1708729114.sapp.pdf [file pnas.1708729114.sapp.pdf]

1 **Supporting Materials**

2

3 Lo NC, Gurarie D, Yoon N, Coulibaly JT, Bendavid E, Andrews JR, and King CH. Impact and  
4 cost-effectiveness of snail control to achieve disease control targets for schistosomiasis. Proc  
5 Natl Acad Sci USA (2017).

6

7

8

9

10

11

12

13

14

15

16

17

18

19

20

21

22

23

24

25

26

27

28

29

30

31

32

33

34

35

36

37

38

39

40

41

42

43

44

45

46

47  
48  
49  
50  
51  
52  
53  
54  
55  
56  
57  
58  
59  
60  
61  
62  
63  
64  
65  
66  
67  
68  
69  
70  
71  
72  
73  
74  
75  
76  
77  
78  
79  
80  
81  
82  
83  
84  
85  
86  
87  
88  
89  
90  
91  
92

**Contents**

Section 1: Technical appendix.....Page 3  
Section 2: Supplemental figures and tables.....Page 15

93 **Technical appendix**

94 In this supplement, we describe the data and methodology used to estimate the cost-effectiveness  
95 of mass drug administration (MDA), snail control, and combined public health strategies against  
96 schistosomiasis.

97  
98 Search strategy for review of snail control costing literature

99 We searched PubMed for relevant articles published in English up to February 2017, using the  
100 search term “molluscicide” or “snail control” and “cost\*” (using wildcard) restricted to the  
101 title/abstract field. This identified 53 articles. All studies were screened, and we identified only  
102 one study in the past 15 years that reported costing of snail control against schistosomiasis. The  
103 majority of the literature with costing data was published between 1970 and 1985. These older  
104 studies were used to guide the costing structure.

105  
106 Snail control costing

107 The estimated cost of snail control was informed by data from the recent SCORE trial that  
108 implemented chemical-based mollusciding, historical literature, and online product costs.<sup>1-6</sup> We  
109 used historical literature, mainly from the St. Lucia studies published in the 1980s, to develop a  
110 cost structure: equipment (capital costs), personnel, transportation, and chemical molluscicide.<sup>1-3</sup>  
111 We estimated personal and transportation requirements and costs for Kenya based on historical  
112 literature and the SCORE trial costing experience.<sup>1-3,7</sup> We determined the necessary equipment  
113 based on the SCORE trial and historical literature, which included spraying units, protective  
114 clothing, GPS, and a pH monitor. We surveyed the price and product description (to estimate  
115 lifetime of product) for equipment online.<sup>8</sup> We annualized the capital cost over the estimated  
116 lifetime of the product. The final costing structure is presented in the main text. We used  
117 historical literature on cost of focal chemical mollusciding (adjusted to 2016 US\$ and a 5000-  
118 person community) to provide a check of validity with our estimates.<sup>1-3</sup>

119 Transmission model: snail population biology and infection

120 The snail population model employed in this analysis was developed in earlier papers.<sup>9-11</sup> Total  
121 snail population density  $N = x + y + z$  is partitioned into standard S-E-I (susceptible- “x”,  
122 exposed-“y”, infected-“z”) compartments (Figure A1).

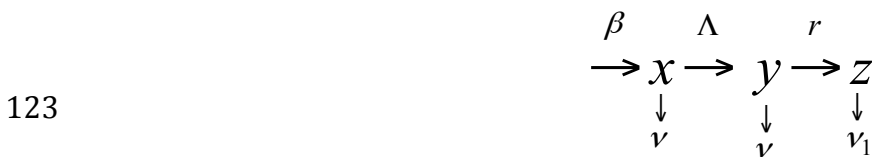

124 *Figure A1: Mathematical schematic of the snail model*

125 In the system,  $\beta$  is snail population growth,  $\Lambda$  is snail force of infection (FOI) as determined by  
126 human infectivity/egg release,  $r$  is patency conversion rate ( $1/r$  - prepatency period), and  $\nu$ ,  $\nu_1$

127 are natural mortality of healthy/prepatent and of patent snails. The resulting system of coupled  
 128 differential equations is:

$$\begin{aligned}
 \frac{dx}{dt} &= \beta - \Lambda x - \nu x \\
 \frac{dy}{dt} &= \Lambda x - (r + \nu) y \\
 \frac{dz}{dt} &= r y - \nu_1 z
 \end{aligned} \tag{1}$$

130 We use logistic-type reproduction term,  $\beta = \beta_0 (1 - N / K)(x + y)$ , with maximal reproduction  
 131 rate  $\beta_0$  and carrying capacity  $K$ . Only susceptible and prepatent snails ( $x + y$ ) can contribute to  
 132 reproduction.

133 In our model, snail FOI ( $\Lambda$ ) is a nonlinear (saturated) function of human infectivity  $E$  (mean egg  
 134 release by host population).<sup>9</sup>

$$\Lambda = \Lambda_0 \left( 1 - \exp \left[ -b \omega \frac{H E}{N} \right] \right) \tag{2}$$

136 Coefficient  $\Lambda_0$  is maximal invasion rate. Paper <sup>9</sup> provides justification for saturated FOI. For  
 137 mixed human population groups (e.g. pre-school aged children, school aged children (SAC),  
 138 adults),  $E$  is the sum of group-infectivity ( $E_C; E_S; E_A$ ) weighted by their population fractions (H),  
 139 and relative exposure/contamination rates ( $\omega$ ).<sup>9,11</sup>

140  
 141 Snail control (mollusciciding) is implemented via instantaneous reduction in snail densities  
 142  $\{x(t), y(t), z(t)\}$  to their fraction  $\{\varepsilon x(t), \varepsilon y(t), \varepsilon z(t)\}$ , where  $\varepsilon$  is the fraction of surviving  
 143 snails (molluscicide efficacy).

144  
 145 As in our previous work,<sup>9</sup> the snail environment is assumed to be stationary, i.e. we take a  
 146 ‘seasonal mean’ carrying capacity  $K(t) = K_0$ , fixed reproduction rate  $\beta_0$ , and human-snail  
 147 contacts. For fixed  $K$ , variables  $(x, y, z)$ , we can rescale over  $K$ , so  $K = 1$ , and total population  
 148  $N < 1$ .

149  
 150 Equilibrium solutions of system (1) along with snail infection data (seasonal mean) are used to  
 151 estimate model parameters (see calibration section below).<sup>9</sup>

152  
 153 Equations (1)-(2) describe an isolated snail habitat. To explore possible external inputs (snail  
 154 migration), we augment system (1) with additional transport terms.

155

$$\begin{aligned} \frac{dx}{dt} &= \dots + r_M (x_M - x) \\ \frac{dy}{dt} &= \dots + r_M (y_M - y) \\ \frac{dz}{dt} &= \dots + r_M (z_M - z) \end{aligned} \quad (3)$$

156 This represents an exchange with an external snail pool having prescribed densities  
 157  $(x_M, y_M, z_M)$ , and transport rate  $r_M$  (a fraction of maximal growth rate  $\beta$ ), that would maintain  
 158 its baseline endemic levels  $(X, Y, Z)$ .

159  
 160 Another modification of system (1)-(2) comes from external human sources of infection. Here  
 161 snail FOI  $\Lambda$  is partitioned into its “local component” (described below) and an external source  
 162 taken as a fraction of maximal FOI  $\Lambda_0$ . This can help simulate “hot spot” environments.

163 Transmission model: human infection in the Stratified Worm Burden (SWB) model

164 The SWB approach used in this model was developed and refined in previous work.<sup>9,11-13</sup> In the  
 165 SWB, the human host population is subdivided into worm burden strata  $\{h_m\}$  ( $\sum_m h_m = 1$ ),  
 166 determined by worm-step  $5 < \Delta w \leq 10$ , so that each  $h_m$  is made up of all local human hosts  
 167 carrying  $m \Delta w \leq w < (m+1) \Delta w$  worms. The worm-step  $\Delta w$  serves as low-density *mating*  
 168 *threshold*, so  $h_0$  are assumed infection-free (no mated couples), while each stratum  $\{h_m : m \geq 1\}$   
 169 carries  $\phi_m$  mated couples.<sup>14,15</sup>

170

$$\phi_m = \frac{m}{2} \left[ 1 - 2^{-m} \binom{m}{m/2} \right] \quad (4)$$

171 The transitions among strata are determined by human FOI  $\lambda$  (rate of worm accumulation/ $\Delta w$ ),  
 172 worm resolution rates  $\gamma_m = \gamma m$  ( $\gamma$  - mean worm mortality), and population turnover rate  $\mu$   
 173 (mortality, maturation, migration, etc.) (Figure A2)

174

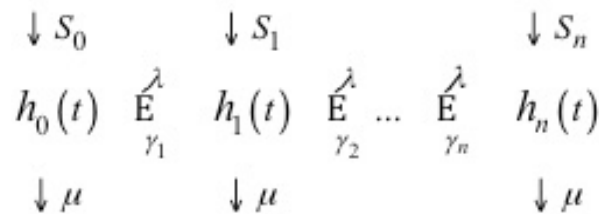

175

176

Figure A2: SWB strata and transitions

177 Source terms  $\dot{S} = (S_k)$  in Figure A2 represent demographic inputs from younger to older age  
 178 groups. For the youngest child group, its source  $\dot{S} = (\mu, 0, 0, \dots)$  comes into the zero-infection  
 179 stratum only, as all newborns are infection-free.

180  
 181 In demographically structured communities, each population sub-group is represented by its own  
 182 SWB coupled via demographic transitions (birth, maturation, death). We use three age groups,  
 183 pre-school children (1-5 years), SAC (6-14 years), adults (15+ years), designated by  $\{h_m^i(t)\}$ ,  
 184  $i = (C, S, A)$ . Each SWB -group is described by its transition matrix  $M(\lambda, \mu, \gamma)$ - a function  
 185 with age-specific human FOI  $\lambda = \lambda_i$ , population turnover -  $\mu_i$ , and worm mortalities -  $\gamma_i$ . The  
 186 younger ages enter older SWB as sources. The coupled system of differential equations for  
 187 vector-functions,  $\dot{h}^C = \{h_m^C(t)\}$ ,  $\dot{h}^S$ ,  $\dot{h}^A$  is given by:

$$\begin{aligned}
 \frac{d\bar{h}^C}{dt} &= M(\lambda_C, \mu_C, \gamma_C) \cdot \bar{h}^C + \bar{S}_C + \mu_C \delta_0 \\
 \frac{d\bar{h}^S}{dt} &= M(\lambda_S, \mu_S, \gamma_S) \cdot \bar{h}^S + \mu_S \bar{h}^C \\
 \frac{d\bar{h}^A}{dt} &= M(\lambda_A, \mu_A, \gamma_A) \cdot \bar{h}^A + \mu_A \bar{h}^S
 \end{aligned} \tag{5}$$

189 Egg release by mated females and individual hosts depends on age-specific worm fecundity  $\rho$ ,  
 190 and the mated-couple count  $\phi_m$  (for the  $h_m$  - stratum). A host in  $m$ -th stratum is assumed to  
 191 release random egg-counts determined by negative binomial (NB)-distribution with mean  
 192  $E_m = \rho \phi_m$ , and aggregation parameter  $k_m = k \phi_m$ .<sup>16,9,11,17</sup> So any test pool of an SWB  
 193 community with population strata  $\{h_m\}$  is viewed as random draw of the NB-mixture  
 194 distribution (with weights  $h_m$ ), illustrated in the schematic plot Figure A3.

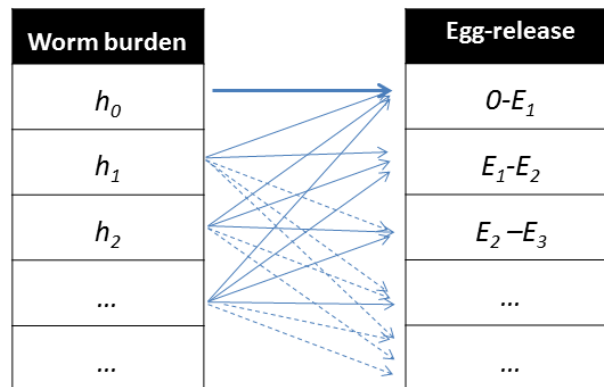

Figure A3: Distributed egg release by SWB strata

195  
 196

197  
198

$$\mathcal{E} = \sum_m h_m NB(\rho \phi_m | k \phi_m) \quad (6)$$

199 While egg-release by individual hosts is random, their cumulative effect on snail FOI is given by  
200 mean human infectivity.

201

$$E(\lambda) = \rho \sum_m \phi_m h_m(\lambda) = \rho \Phi(\lambda). \quad (7)$$

202  $\Phi(\lambda)$  is mean mated count of SWB group  $\{h_m(\lambda)\}$ .

203 In structured communities, group infectivities (7) are combined into a single human “mean  
204 infectivity”, determined by group population fractions ( $\sum_i H_i = 1$ ), and their exposure rates,  
205  $\omega_C; \omega_S; \omega_A$  “child/SAC/adult”,

206

$$E = H_C \omega_C E_C + H_S \omega_S E_S + H_A \omega_A E_A \quad (8)$$

207 Human infectivity (8) enters the snail FOI (2) of the coupled human-snail model system. Egg-  
208 test results are used for diagnostic purposes to assess low and high infection prevalence at a  
209 particular time (simulated EPG test). Such prevalences depend on human inputs: SWB-state  
210  $\frac{1}{h} = (h_m)$ , worm fecundity ( $\rho$ ), and aggregation parameter  $k$ . For instance, positive prevalence  
211 ( $E > 0$ ), assuming the SWB-NB mixture hypothesis (6), is given by

212

$$P = 1 - \sum h_m \left( \frac{k}{k + \rho} \right)^{k \phi_m}$$

213 Coupled human-snail system and model calibration

214 Human and snail equations (1) - (5) are coupled via two transmission coefficients  $A$  (snail-to-  
215 human) and  $B$  (human-to-snail). The  $A$  -coefficient is included in the human FOI expression  
216  $\lambda = Az$  (patent snail prevalence), and coefficient  $B$  is included in the exponent of the saturated  
217 snail FOI,  $\Lambda$ .

218  
219 The details of model calibration and estimated parameter values are explained in previously  
220 published papers.<sup>9,11</sup> The estimated model parameters include age-specific human FOI  $\lambda_i$ , worm  
221 fecundity  $\rho_i$ , aggregation  $k_i$ , and the resulting transmission rates  $A_i$ ,  $B$ , as summarized in Table  
222 A1. Specifically, A-coefficients are estimated from calibrated human FOI  $\lambda_i$  and (known or  
223 hypothesized) patent snail density  $z$

224

$$A_i = \frac{\lambda_i}{z}, \quad i = (C, S, A)$$

225 The B-coefficient (of reference SAC group) enters in snail FOI  $\Lambda$  (2) along with maximal  
 226 invasion parameter  $\Lambda_0$ , and  $\Lambda$  is expressed through the basic snail inputs (below).

227 There are 3 types of model inputs in our setup.

228 (i) **Human parameters** are made of age-specific triplets  $(\lambda_i, k_i, \rho_i)$ ,  $i = \{C, S, A\}$ ; they  
 229 enter in the human infectivity function  $E_i = \rho_i \Phi(\lambda_i)$ , equation (8)

230 (ii) **Snail inputs** include total (equilibrium) population  $N < 1$ , endemic prepatent and patent  
 231 prevalence  $(Y, Z) = (y, z) / N$ ; natural mortalities  $\nu < \nu_1$ . The remaining parameters of  
 232 snail model (1) are estimated from  $(N, Y, Z)$

$$\begin{aligned} \beta_0 &= \frac{\nu + (\nu_1 - \nu)Z}{(1 - N)(1 - Z)} \\ r &= \frac{\nu_1 Z}{Y} \\ \Lambda_0 &= \frac{\nu Y + \nu_1 Z}{1 - Y - Z} \end{aligned} \quad (9)$$

234 The latter (FOI  $\Lambda$ ) along with estimated human infectivity  $E$ , give an algebraic relation between  
 235  $\Lambda_0$  and transmission coefficient  $B$

$$\Lambda = \Lambda_0 N \left(1 - e^{-B E H / N}\right) \quad (10)$$

237 Combined human infectivity  $E$  in (10) is contributed by all age-groups via

$$E = H_S \Phi_S + H_C \frac{\rho_C}{\rho_S} \Omega_C \Phi_C + H_A \frac{\rho_A}{\rho_S} \Omega_A \Phi_A \quad (11)$$

239 Here  $\{H_i\}$  are known population fractions,  $\{\rho_i\}$  - estimated worm fecundity,  $\Phi_i$  - mean mated

240 count for each age-group. Three addition inputs are uncertain relative exposures:  $\Omega_C = \frac{\omega_C}{\omega_S}$

241 (child/SAC),  $\Omega_A = \frac{\omega_A}{\omega_S}$  (adult/SAC), and transmission coefficient  $B$  in the exponent (10) (for

242 SAC reference group)

$$B = b_S \rho_S \omega_S \quad (12)$$

244 Human calibration in the present study, was obtained from test data on *S. haematobium* collected  
 245 in coastal Kenya.<sup>18,19</sup> A Bayesian-type calibration procedure provides a range of likely parameter  
 246 choices - posterior distribution in 9D space  $\{(\lambda_i, k_i, \rho_i)\}$ .

247 Additional uncertainties include snail inputs  $(N, Y, Z)$  and environmental conditions  $(b, \Omega_C, \Omega_A)$ .



248 We sample model uncertainties to provide variability and generate a 95% uncertainty interval  
 249 (UI) in the transmission projection for control interventions.

250

251 **Table A1: Summary of model parameters**

|                              | Known, fixed                                                                                                                                                                                              |      |      | Calibrated                                                                                                                                                   |      |
|------------------------------|-----------------------------------------------------------------------------------------------------------------------------------------------------------------------------------------------------------|------|------|--------------------------------------------------------------------------------------------------------------------------------------------------------------|------|
| Human                        | Demographic inputs                                                                                                                                                                                        |      |      | Posterior distributions of<br>$\{\lambda^i, \rho^i, k^i\}$ , for 3 age-group<br>$i = \{C, S, A\}$ , estimated from<br>community test data <sup>(18,19)</sup> |      |
|                              | Population fractions                                                                                                                                                                                      | C    | S    |                                                                                                                                                              | A    |
|                              | Host turnover/year                                                                                                                                                                                        | 0.18 | 0.28 |                                                                                                                                                              | 0.54 |
|                              | Worm mortality/year                                                                                                                                                                                       | 0.21 | 0.1  |                                                                                                                                                              | 0.02 |
|                              |                                                                                                                                                                                                           | 0.2  | 0.2  | 0.25                                                                                                                                                         |      |
| Snail                        | Mortality: (susceptible/prepatent) $\nu = 4$ /year,<br>(patent) $\nu_1 = 12$ /year <sup>20,21</sup><br>Baseline equilibrium values <sup>1</sup> :<br>$.6 < N < .95$<br>$.15 < Y < .45$<br>$.05 < Z < .15$ |      |      | Estimated<br>Max reproduction rate: $\beta_0$ <sup>2)</sup><br>Max invasion (FOI) rate: $\Lambda_0$                                                          |      |
| Environment/<br>transmission | Basic (SAC) transmission rate: $.5 < B < 3$<br>Relative exposure/contamination rates (“child/SAC,<br>adult/SAC): $.5 < \Omega_{C/A} < 1.5$                                                                |      |      | Transmission coefficients<br>$A_i = \lambda^i / Z$                                                                                                           |      |

252 <sup>1)</sup> These ranges are broadly consistent with published data <sup>21,20,18</sup>

253 <sup>2)</sup> Consistent with observed snail growth/rebound rates <sup>21</sup>

254 Simulation of snail control and human prevalence and incidence

255 The coupled SWB-snail model is used to simulate the effect of focal chemical-based  
 256 mollusciciding programs on human prevalence and infection incidence. The latter (incidence) is  
 257 commonly used in long-term snail control studies. In the SWB setup, the instantaneous incidence  
 258 function can be defined as human FOI times uninfected stratum, i.e. the rate of transition from  
 259 “uninfected to infected”:

260 
$$F(t) = \lambda(t)h_0(t) = Az(t)h_0(t) \quad (13)$$

261 Here  $A$  is snail-to-human transmission coefficient,  $z(t)$  – patent snail density. For mixed  
 262 communities (C-S-A), functions (13) are weighted by population fractions of each group to  
 263 generate a combined population incidence. The incidence function can undergo wide changes  
 264 during molluscicide and frequently rebounds, so the effect on transmission is often temporary.

265 The mean incidence is computed  $F(t)$  over the inter-molluscicide period ( $\tau = 1/2$ -1 years),

266 
$$\bar{F}_j = \frac{1}{\tau} \int_0^\tau F(j\tau + t) dt, \quad (14)$$

267 for  $j$ -th control period ( $j = 0, 1, 2, \dots$ ). The terminal relative incidence,  $\bar{F}_n / \bar{F}_0$  is reported as the  
 268 program outcome (effectiveness).

269  
 270 Each simulated community had biological/transmission parameters and control inputs that affect  
 271 snail control effectiveness. The biological/transmission parameters include,  $A$  – snail-to-human,  
 272  $B$  – human-to-snail,  $\Lambda$  - maximal miracidia invasion,  $\beta$  - max snail reproduction/growth. The  
 273 control inputs are  $\epsilon < 1$  - molluscicide efficacy (fraction of snail removed),  $\tau$  - inter-  
 274 molluscicide interval,  $T$  - program duration. We provide hypothetical simulations below (Figure  
 275 A4).

276  
 277 Mollusciciding removes a fraction of normal snail density,  $N \rightarrow \epsilon N$  ( $\delta = 1$ ) along with infected  
 278 and patent snails, after which the population may return to precontrol snail levels driven by the  
 279 snail population's logistic growth term. We implemented each mollusciciding as an  
 280 instantaneous event (due to short duration of chemical in the environment). Typical long-term  
 281 molluscicide histories (human/snail prevalence and incidence functions) are illustrated below  
 282 with three hypothetical examples using a range of different input parameters (table below) to  
 283 illustrate the effect on snail control dynamics.

|          | <b>A</b>    | <b>B</b>    | <b><math>\Lambda</math></b> | <b><math>\beta</math></b> | <b><math>\epsilon</math></b> | <b><math>\tau</math></b> |
|----------|-------------|-------------|-----------------------------|---------------------------|------------------------------|--------------------------|
| <b>1</b> | <b>32.</b>  | <b>1.54</b> | <b>14.8</b>                 | <b>12.</b>                | <b>0.05</b>                  | <b>0.33</b>              |
| <b>2</b> | <b>40.2</b> | <b>2.07</b> | <b>13.5</b>                 | <b>12.1</b>               | <b>0.15</b>                  | <b>0.5</b>               |
| <b>3</b> | <b>37.</b>  | <b>1.6</b>  | <b>13.5</b>                 | <b>13.2</b>               | <b>0.15</b>                  | <b>1</b>                 |

284  
 285 In case (1), shown in Figure A4 (high frequency  $\tau = 1/3$  year, i.e. 3x per year, and high efficacy  
 286  $\epsilon = .05$ ), the snail population is driven to extinction, hence human incidence drops to zero and  
 287 infection prevalence gradually relaxes to zero due to natural worm mortality. This is a  
 288 hypothetical example of a program with perfect effectiveness.

289 In case (2) (frequency  $\tau = 1/2$  year, efficacy  $\epsilon = .15$ ), the system settles in a limit-cycle pattern  
 290 with lower mean snail density and mean incidence (14); the effectiveness = 0.39 is temporary  
 291 and defined over the time period between molluscicide applications.

292 In case (3) (frequency  $\tau = 1$  year, efficacy  $\epsilon = .15$ ), the snail population rebounds to precontrol  
 293 levels and the resulting terminal mean incidence (effectiveness) is limited (effectiveness=0.92),  
 294 so there is only minor reductions in incidence for a short period of time between applications of  
 295 molluscicide.

296 In all cases, reduced incidence combined with natural worm mortality reduces infection  
 297 prevalence between Y1 and Y5. Specifically, SAC prevalence drop: 35% to 12% (case 1), 52%  
 298 to 26% (case 2), and 48% to 35% (case 3).

299

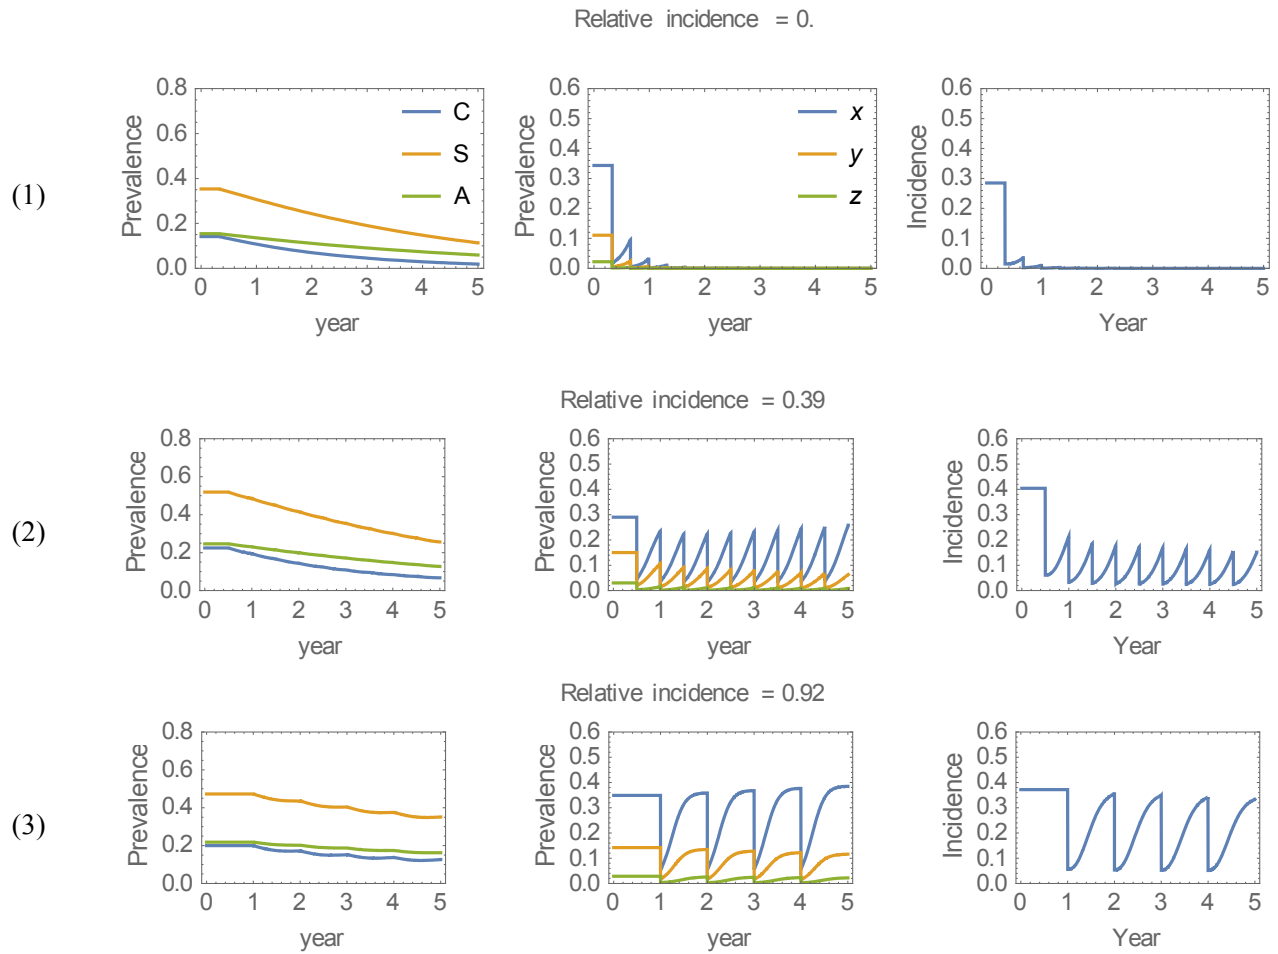

300 *Figure A4: Three hypothetical histories of 5-year molluscicide programs with different choices*  
 301 *of transmission parameters and control inputs to simulate variability of snail control*  
 302 *effectiveness, we simulate: (A) perfect effectiveness; (B) moderate effectiveness; (C) limited*  
 303 *effectiveness for snail control.*

304 Operationally, snail control effectiveness is a function of multiple calibrated parameters that  
 305 produce a wide range of possible values. This distribution (in terms of relative incidence  
 306 reduction) was estimated and calibrated to broadly align with data from a recent meta-analysis of  
 307 observational studies (Figure A5).<sup>22</sup>

308

309 In the study, we modeled two frequencies, semiannual ( $\tau = 1/2$  years, twice a year) and annual ( $\tau$   
 310  $= 1$  year). For each  $\tau$ , we simulated an ensemble of 50 virtual communities by random sampling  
 311 from the five fitted parameter ranges (ranges below), which provided a distribution of effect  
 312 sizes for snail control.

313

| A     | B       | $\Lambda$ | $\beta$ | $\varepsilon$ |
|-------|---------|-----------|---------|---------------|
| 30-45 | 1.5-2.5 | 10-15     | 10-15   | 0.05-0.15     |

314

315 The resulting molluscicide histories differed widely (Fig. A4-5). Semiannual snail control was  
316 more broadly distributed (50% +), while low-frequency (once per year) snail control  
317 demonstrated moderate reduction (30% or less) over this time period. The predicted molluscicide  
318 effectiveness, defined as mean-incidence reduction over a five-year period (Year 5 relative to  
319 Year 1) is provided in Figure A5. These data were calibrated to broadly align with meta-analysis  
320 data from observational studies (Figure A4-5).<sup>22</sup>  
321

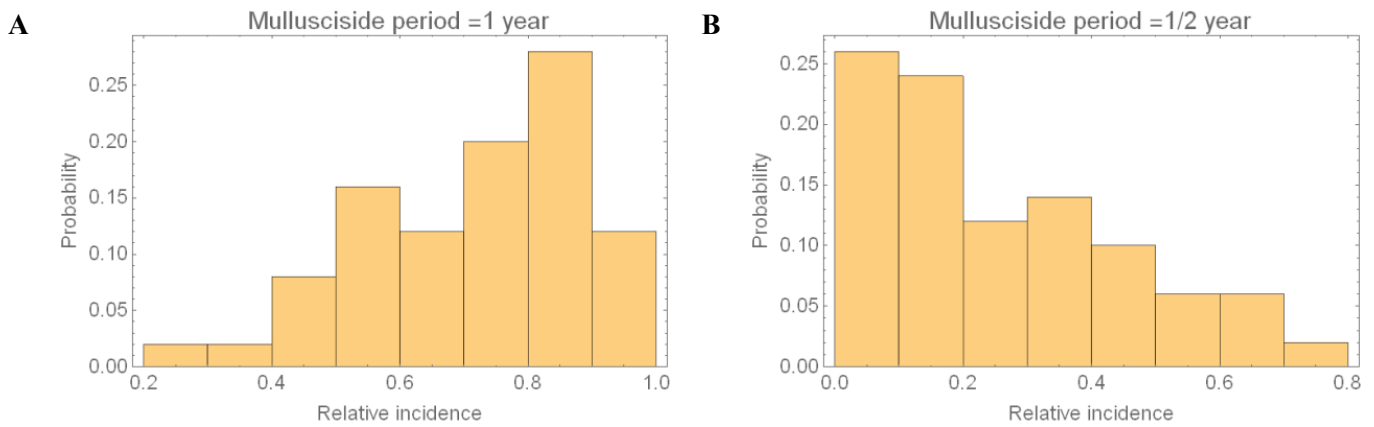

322 *Figure A5: Histogram of relative incidence reductions (snail control effectiveness) for annual*  
323 *and semiannual frequency of snail control over a five-year simulation*  
324  
325  
326  
327  
328  
329  
330  
331  
332  
333  
334  
335  
336  
337  
338  
339  
340  
341  
342  
343

344 **References**

- 345 1. Barnish G. Evaluation of chemotherapy in the control of *Schistosoma mansoni* in  
346 Marquis Valley, Saint Lucia. II. Biological results. *Am J Trop Med Hyg* 1982; **31**(1): 111-5.
- 347 2. Barnish G, Christie JD, Prentice MA. *Schistosoma mansoni* control in Cul de Sac Valley,  
348 Saint Lucia. I. A two-year focal surveillance-mollusciciding programme for the control of  
349 *Biomphalaria glabrata*. *Trans R Soc Trop Med Hyg* 1980; **74**(4): 488-92.
- 350 3. Barnish G, Jordan P, Bartholomew RK, Grist E. Routine focal mollusciciding after  
351 chemotherapy to control *Schistosoma mansoni* in Cul de Sac valley, Saint Lucia. *Trans R Soc*  
352 *Trop Med Hyg* 1982; **76**(5): 602-9.
- 353 4. Lo NC, Bogoch, II, Blackburn BG, et al. Comparison of community-wide, integrated  
354 mass drug administration strategies for schistosomiasis and soil-transmitted helminthiasis: a cost-  
355 effectiveness modelling study. *Lancet Glob Health* 2015; **3**(10): e629-38.
- 356 5. Lo NC, Lai YS, Karagiannis-Voules DA, et al. Assessment of global guidelines for  
357 preventive chemotherapy against schistosomiasis and soil-transmitted helminthiasis: a cost-  
358 effectiveness modelling study. *Lancet Infect Dis* 2016; **16**(9): 1065-75.
- 359 6. WHO. Preventive chemotherapy in human helminthiasis. Coordinated use of  
360 anthelmintic drugs in control interventions: a manual for health professionals and programme  
361 managers: Geneva: World Health Organization, 2006.
- 362 7. Brooker S, Kabatereine NB, Myatt M, Stothard JR, Fenwick A. Rapid assessment of  
363 *Schistosoma mansoni*: the validity, applicability and cost-effectiveness of the Lot Quality  
364 Assurance Sampling method in Uganda. *Trop Med Int Health* 2005; **10**(7): 647-58.
- 365 8. Amazon.com. (accessed 02/2017).
- 366 9. Gurarie D, King CH, Yoon N, Li E. Refined stratified-worm-burden models that  
367 incorporate specific biological features of human and snail hosts provide better estimates of  
368 *Schistosoma* diagnosis, transmission, and control. *Parasit Vectors* 2016; **9**(1): 428.
- 369 10. Gurarie D, King C, Yoon N, Alsallaq R, Wang X. Seasonal Dynamics of Snail  
370 Populations in Coastal Kenya: Model Calibration and Snail Control. *Advances in Water*  
371 *Resources* 2016.
- 372 11. Gurarie D, Yoon N, Li E, et al. Modelling control of *Schistosoma haematobium*  
373 infection: predictions of the long-term impact of mass drug administration in Africa. *Parasit*  
374 *Vectors* 2015; **8**(1): 529.
- 375 12. Gurarie D, King CH. Population biology of *Schistosoma* mating, aggregation, and  
376 transmission breakpoints: more reliable model analysis for the end-game in communities at risk.  
377 *PLoS One* 2014; **9**(12): e115875.
- 378 13. Gurarie D, King CH, Wang X. A new approach to modelling schistosomiasis  
379 transmission based on stratified worm burden. *Parasitology* 2010; **137**(13): 1951-65.
- 380 14. May RM. Togetherness among schistosomes: its effects on the dynamics of the infection.  
381 *Mathematical biosciences* 1977; **35**(3): 301-43.
- 382 15. Anderson RM, May RM. Infectious Diseases of Humans. Oxford: Oxford University  
383 Press; 1991.
- 384 16. Hubbard A, Liang S, Maszle D, Qiu D, Gu X, Spear RC. Estimating the distribution of  
385 worm burden and egg excretion of *Schistosoma japonicum* by risk group in Sichuan Province,  
386 China. *Parasitology* 2002; **125**(Pt 3): 221-31.
- 387 17. Gryseels B, De Vlas SJ. Worm burdens in schistosome infections. *Parasitol Today* 1996;  
388 **12**(3): 115-9.

389 18. Muchiri EM, Ouma JH, King CH. Dynamics and control of *Schistosoma haematobium*  
390 transmission in Kenya: an overview of the Msambweni Project. *Am J Trop Med Hyg* 1996; **55**(5  
391 Suppl): 127-34.

392 19. Bisanzio D, Mutuku F, Bustinduy AL, et al. Cross-sectional study of the burden of  
393 vector-borne and soil-transmitted polyparasitism in rural communities of Coast Province, Kenya.  
394 *PLoS Negl Trop Dis* 2014; **8**(7): e2992.

395 20. Webbe G. Quantitative studies of intermediate host populations in the transmission of  
396 schistosomes. *Proceedings of the Royal Society of Medicine* 1968; **61**(5): 455.

397 21. Sturrock RF. Field studies on the transmission of *Schistosoma mansoni* and on the  
398 bionomics of its intermediate host, *Biomphalaria glabrata*, on St. Lucia, West Indies. *Int J*  
399 *Parasitol* 1973; **3**(2): 175-94.

400 22. King CH, Sutherland LJ, Bertsch D. Systematic review and meta-analysis of the impact  
401 of chemical-based mollusciciding for control of *Schistosoma mansoni* and *S. haematobium*  
402 transmission. *PLoS Negl Trop Dis* 2015; **9**(12): e0004290.

403

404

405

406

407

408

409

410

411

412

413

414

415

416

417

418

419 **Supplemental figures and tables**

420 Figure S1: Effectiveness of all MDA, snail control, and combined interventions for  
421 schistosomiasis in low and high burden Kenyan communities  
422  
423 Figure S2: Kernel density plot for the uncertainty analysis with key model parameters  
424  
425 Figure S3: Cost-effectiveness acceptability curves, plotting proportion of simulations  
426 below a corresponding incremental cost-effectiveness ratio  
427  
428 Table S1: Costs, disability, and incremental cost-effectiveness of MDA, snail control, and  
429 combined interventions for schistosomiasis in low and high burden Kenyan communities  
430  
431 Table S2: Scenario analysis for snail and human population density, MDA coverage, and  
432 systematic non-compliance in low prevalence settings  
433  
434 Table S3: Scenario analysis for snail and human population density, MDA coverage, and  
435 systematic non-compliance in high prevalence settings  
436  
437 Table S4: Parameter specifications for uncertainty analysis and generation of uncertainty  
438 intervals  
439  
440 Table S5: Undiscounted costs, disability, and incremental cost-effectiveness of MDA,  
441 snail control, and combined interventions for schistosomiasis in low and high burden  
442 Kenyan communities  
443  
444 Table S6: One-way sensitivity analysis varying cost estimates until key strategies are no  
445 longer highly cost-effective  
446  
447  
448  
449  
450  
451  
452  
453  
454  
455

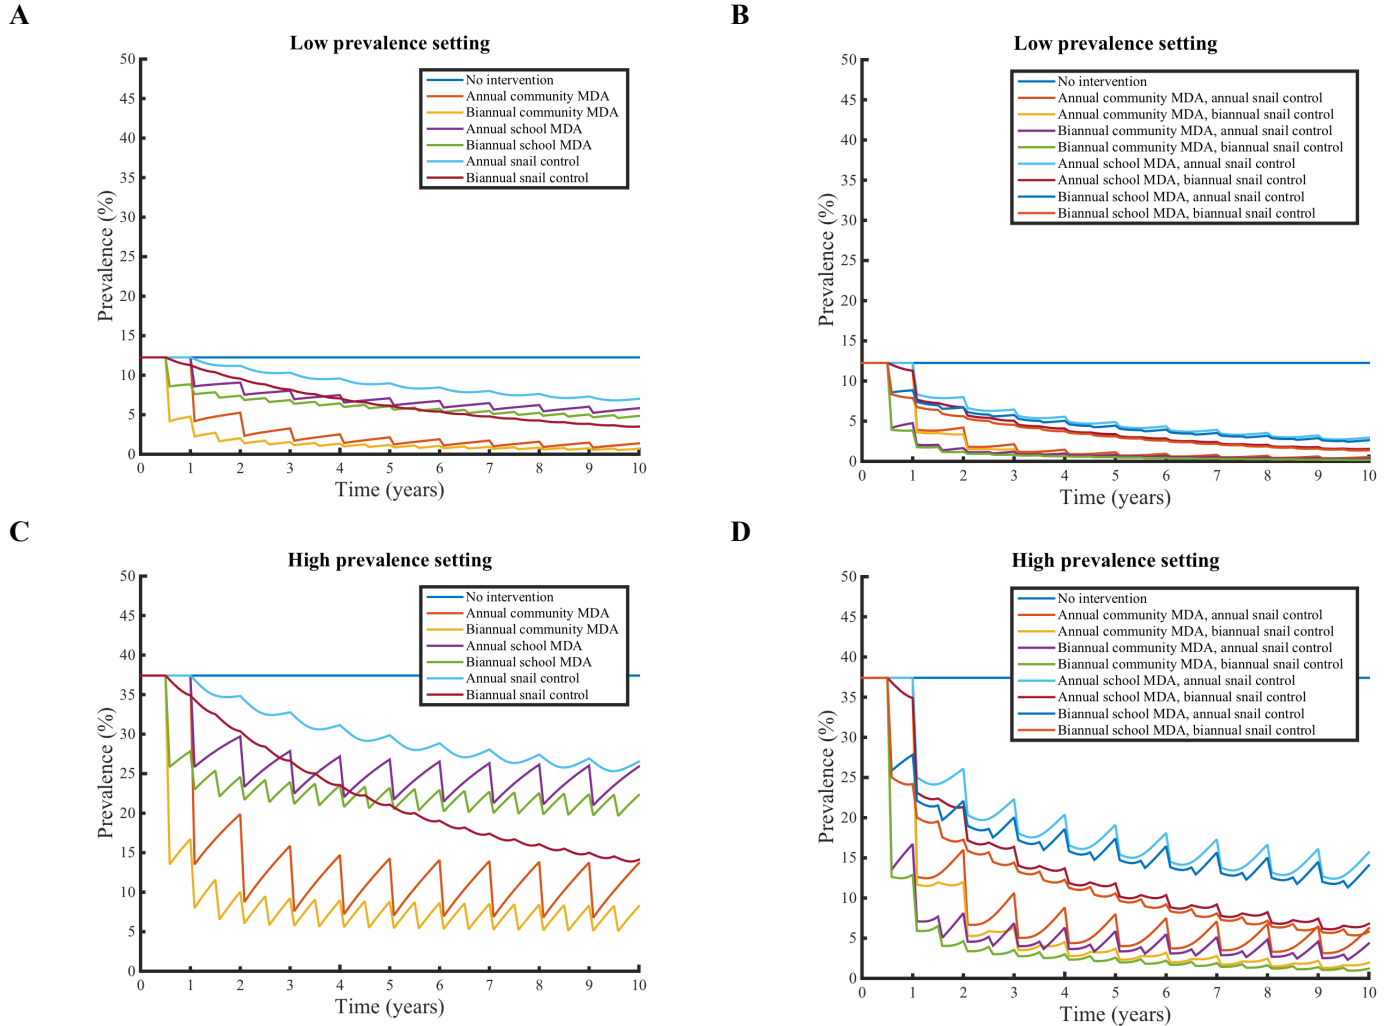

456 **Figure S1: Effectiveness of all MDA, snail control, and combined interventions for**  
 457 **schistosomiasis in low and high burden Kenyan communities.** We simulated interventions of  
 458 MDA, snail control, and combined approaches in an age-stratified population of pre-SAC, SAC,  
 459 and adults in a: (a-b) low prevalence Kenyan community; and (c-d) high prevalence Kenyan  
 460 community with 75% coverage for MDA. We displayed MDA or snail control alone in panel A  
 461 and C and combined strategies in panel B and D for improved visualization.  
 462  
 463



A

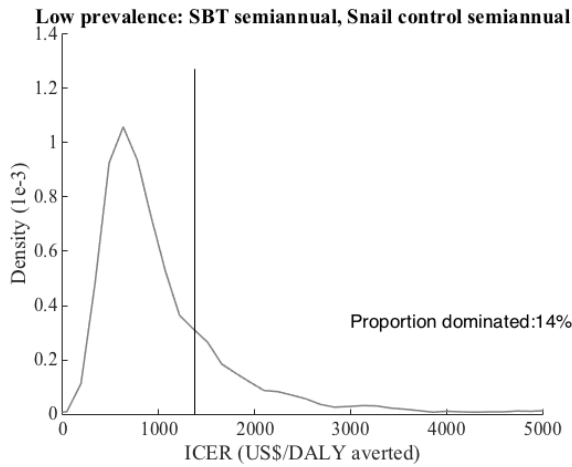

B

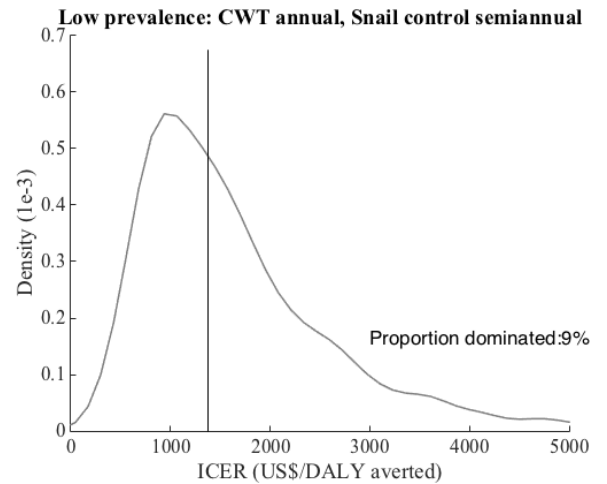

C

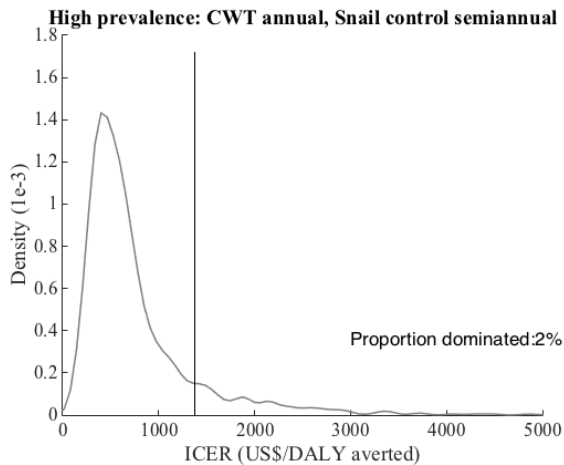

D

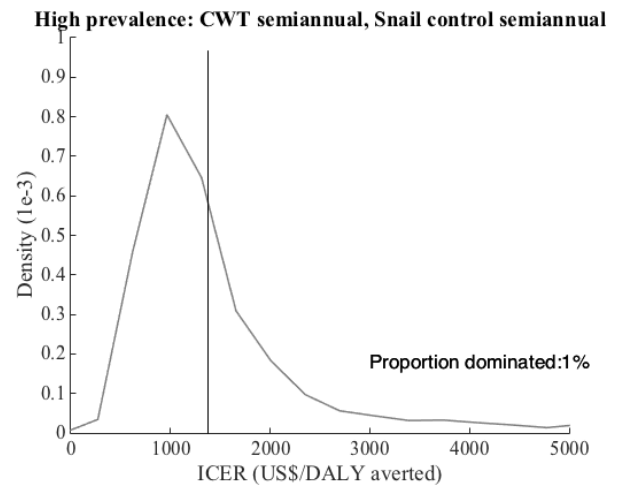

464 **Figure S2: Kernel density plot for the uncertainty analysis with key model parameters.** This  
 465 uncertainty analysis (probabilistic sensitivity analysis) tested the effect of changing multiple  
 466 model inputs simultaneously on the incremental cost-effectiveness ratio (ICER) of the highly  
 467 cost-effective interventions from the primary analysis: (a) semiannual school-based MDA (SBT)  
 468 with semiannual snail control in low burden settings; (b) annual community-wide MDA (CWT)  
 469 with semiannual snail control in low burden settings; (c) annual community-wide MDA with  
 470 semiannual snail control in high burden settings; and (d) semiannual community-wide MDA  
 471 with semiannual snail control in high burden settings. The distribution left of the vertical line  
 472 (ICER of US\$1,377/DALY) represents a highly cost-effective intervention. The proportion of  
 473 simulations where each strategy is dominated is reported in the figure.

474

475

476

477

478

479

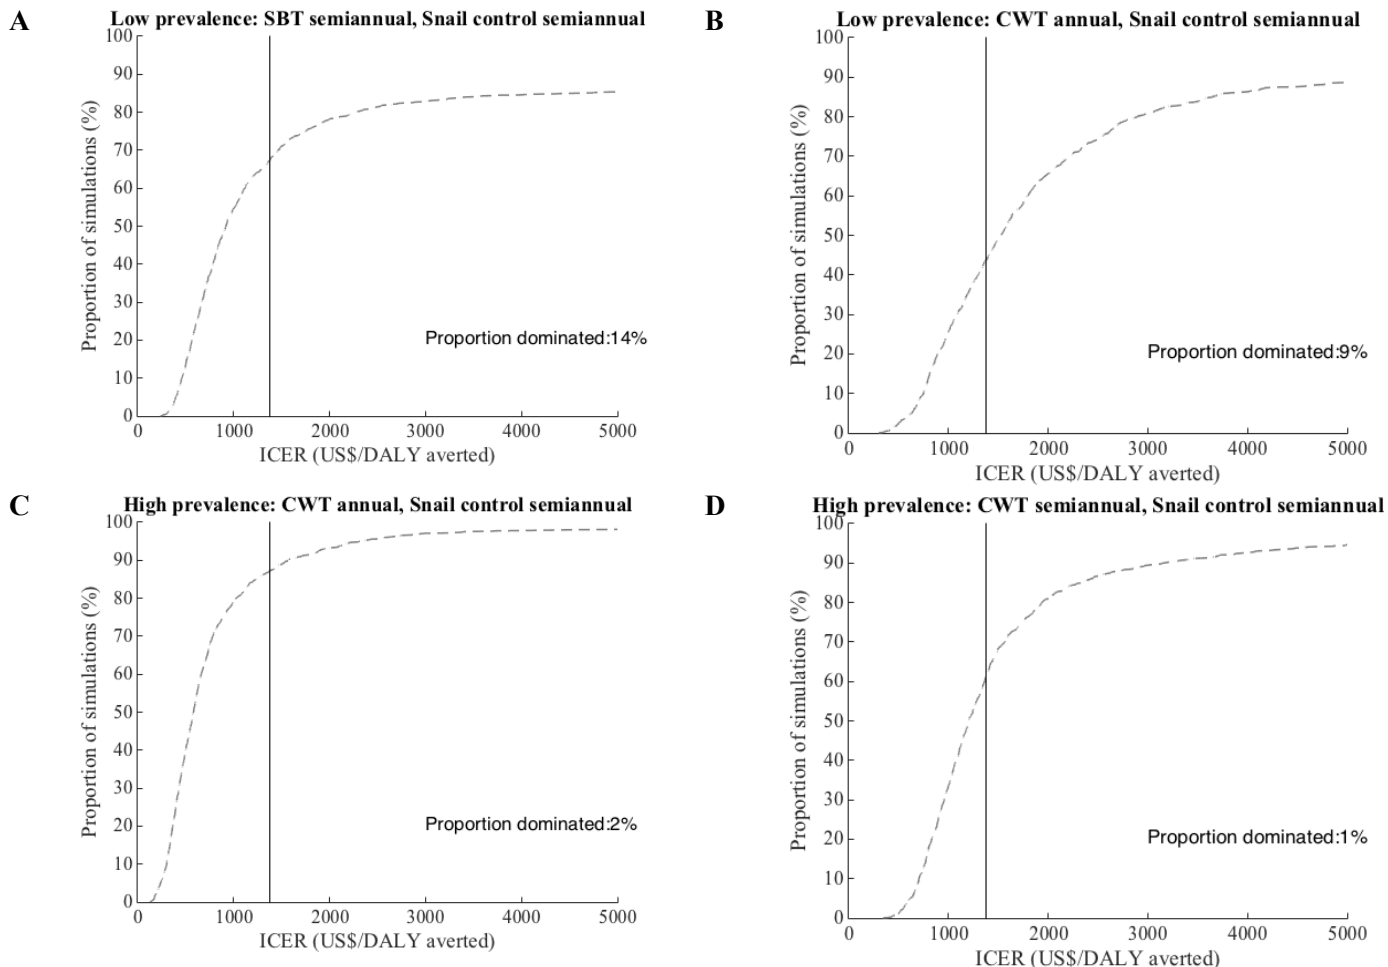

480 **Figure S3: Cost-effectiveness acceptability curves, plotting proportion of simulations below**  
 481 **a corresponding incremental cost-effectiveness ratio.** This uncertainty analysis (probabilistic  
 482 sensitivity analysis) tested the effect of changing multiple model inputs simultaneously on the  
 483 incremental cost-effectiveness ratio (ICER) of the highly cost-effective intervention from the  
 484 primary analysis, compared with the next most effective, non-dominated strategy. We plotted the  
 485 cumulative proportion of simulations below a corresponding ICER. The proportion of  
 486 simulations where each strategy is dominated by another strategy is reported in the figure, and  
 487 provided a ceiling for maximum proportion of simulations. These results are for: (a) semiannual  
 488 school-based MDA (SBT) with semiannual snail control in low burden settings; (b) annual  
 489 community-wide MDA (CWT) with semiannual snail control in low burden settings; (c) annual  
 490 community-wide MDA with semiannual snail control in high burden settings; and (d)  
 491 semiannual community-wide MDA with semiannual snail control in high burden settings. The  
 492 vertical line (ICER of US\$1,377/DALY) represents one interpretation of a highly cost-effective  
 493 intervention.

494  
 495  
 496  
 497

498 **Table S1: Costs, disability, and incremental cost-effectiveness of MDA, snail control, and**  
 499 **combined interventions for schistosomiasis in low and high burden Kenyan communities**

| <b>Low prevalence</b>  | <b>MDA</b>     | <b>Snail control</b> | <b>Total cost (US\$)</b> | <b>Total disability (DALYs)</b> | <b>ICER (US\$/DALY)</b> |
|------------------------|----------------|----------------------|--------------------------|---------------------------------|-------------------------|
|                        | None           | None                 | 0                        | 171.6                           | --                      |
|                        | None           | Annual               | 3,334                    | 127.5                           | 76                      |
|                        | SBT annual     | None                 | 6,550                    | 98.5                            | dominated <sup>b</sup>  |
|                        | None           | Semiannual           | 6,667                    | 96.2                            | 107                     |
|                        | SBT semiannual | None                 | 13,100                   | 84.3                            | dominated <sup>a</sup>  |
|                        | SBT annual     | Annual               | 9,884                    | 74.6                            | 149                     |
|                        | SBT semiannual | Annual               | 16,434                   | 65.9                            | dominated <sup>a</sup>  |
|                        | SBT annual     | Semiannual           | 13,217                   | 60.2                            | 232                     |
|                        | SBT semiannual | Semiannual           | 19,768                   | 53                              | 904                     |
|                        | CWT, annual    | None                 | 47,116                   | 44.6                            | dominated <sup>b</sup>  |
|                        | CWT annual     | Annual               | 50,449                   | 35.2                            | dominated <sup>b</sup>  |
|                        | CWT annual     | Semiannual           | 53,783                   | 30.7                            | 1,531                   |
|                        | CWT semiannual | None                 | 94,231                   | 26.8                            | dominated <sup>b</sup>  |
|                        | CWT semiannual | Annual               | 97,565                   | 22.7                            | dominated <sup>b</sup>  |
|                        | CWT semiannual | Semiannual           | 100,900                  | 19.9                            | 4,353                   |
| <b>High prevalence</b> | <b>MDA</b>     | <b>Snail control</b> | <b>Total cost (US\$)</b> | <b>Total disability (DALYs)</b> | <b>ICER (US\$/DALY)</b> |
|                        | None           | None                 | 0                        | 550                             | --                      |
|                        | None           | Annual               | 3,334                    | 435.4                           | 29                      |
|                        | SBT annual     | None                 | 6,550                    | 352.4                           | dominated <sup>b</sup>  |
|                        | None           | Semiannual           | 6,667                    | 326.6                           | 31                      |
|                        | SBT semiannual | None                 | 13,100                   | 304.7                           | dominated <sup>a</sup>  |
|                        | SBT annual     | Annual               | 9,884                    | 260.3                           | 49                      |
|                        | SBT semiannual | Annual               | 16,434                   | 228.8                           | dominated <sup>a</sup>  |
|                        | CWT, annual    | None                 | 47,116                   | 204.6                           | dominated <sup>a</sup>  |
|                        | SBT annual     | Semiannual           | 13,217                   | 194.9                           | 51                      |
|                        | SBT semiannual | Semiannual           | 19,768                   | 167.4                           | 238                     |
|                        | CWT annual     | Annual               | 50,449                   | 140.1                           | dominated <sup>b</sup>  |
|                        | CWT semiannual | None                 | 94,231                   | 132                             | dominated <sup>a</sup>  |
|                        | CWT annual     | Semiannual           | 53,783                   | 109.6                           | 588                     |
|                        | CWT semiannual | Annual               | 97,565                   | 94.2                            | dominated <sup>b</sup>  |
|                        | CWT semiannual | Semiannual           | 100,900                  | 70.7                            | 1,213                   |

500 Base case analysis assumed 10% systematic non-compliance and 3% discounting. For interpretation, a lower ICER  
 501 is a more cost-effective strategy relative to another intervention. An ICER below 1,377 US\$/DALY is highly cost-  
 502 effective in Kenya, although ICERs are provided to relax reliance on a single threshold. SBT, school-based  
 503 treatment with MDA; CWT, community-wide treatment with MDA

504 <sup>a-b</sup> 'dominated' strategy were (a) strictly dominated when they had a lower effectiveness and higher cost than  
 505 another choice; or (b) dominated by extension when the strategy was less effective and had a higher ICER relative to  
 506 another choice.  
 507

508 **Table S2: Scenario analysis for snail and human population density, MDA coverage, and**  
 509 **systematic non-compliance in low prevalence settings.**

| Strategy                                     | Snail/human density | MDA community coverage | Systematic non-compliance | Cost (US\$) | DALYs averted | ICER (US\$/DALY) |
|----------------------------------------------|---------------------|------------------------|---------------------------|-------------|---------------|------------------|
| SBT semiannual MDA, semiannual snail control | Low                 | Low, 50%               | --                        | 19768       | 34.2          | 1327             |
|                                              | High                | Low, 50%               | --                        | 19768       | 80.6          | 400              |
|                                              | Low                 | High, 85%              | --                        | 19768       | 25.8          | 1872             |
|                                              | High                | High, 85%              | --                        | 19768       | 69.5          | 577              |
|                                              | Low                 | --                     | None, 0%                  | 19768       | 27.0          | 1455             |
|                                              | High                | --                     | None, 0%                  | 19768       | 58.3          | 569              |
|                                              | Low                 | --                     | High, 10%                 | 19768       | 30.2          | 1684             |
|                                              | High                | --                     | High, 10%                 | 19768       | 70.8          | 579              |
| CWT annual MDA, semiannual snail control     | Low                 | Low, 50%               | --                        | 53783       | 25.6          | 3961             |
|                                              | High                | Low, 50%               | --                        | 53783       | 58.1          | 1513             |
|                                              | Low                 | High, 85%              | --                        | 53783       | 16.2          | 3532             |
|                                              | High                | High, 85%              | --                        | 53783       | 38.7          | 1104             |
|                                              | Low                 | --                     | None, 0%                  | 53783       | 15.6          | 2965             |
|                                              | High                | --                     | None, 0%                  | 53783       | 27.8          | 2988             |
|                                              | Low                 | --                     | High, 10%                 | 53783       | 21.1          | 3766             |
|                                              | High                | --                     | High, 10%                 | 53783       | 45.5          | 1347             |

The ICER is computed in reference to the next most effective, non-dominated strategy.

510  
511  
512  
513  
514  
515  
516  
517  
518

519 **Table S3: Scenario analysis for snail and human population density, MDA coverage, and**  
 520 **systematic non-compliance in high prevalence settings.**

| Strategy                                     | Snail/human density | MDA community coverage | Systematic non-compliance | Cost (US\$) | DALYs averted | ICER (US\$/DALY) |
|----------------------------------------------|---------------------|------------------------|---------------------------|-------------|---------------|------------------|
| CWT annual MDA, semiannual snail control     | Low                 | Low, 50%               | --                        | 53783       | 123.5         | 948              |
|                                              | High                | Low, 50%               | --                        | 53783       | 236.8         | 491              |
|                                              | Low                 | High, 85%              | --                        | 53783       | 86.9          | 688              |
|                                              | High                | High, 85%              | --                        | 53783       | 160.4         | 308              |
|                                              | Low                 | --                     | None, 0%                  | 53783       | 76.8          | 65               |
|                                              | High                | --                     | None, 0%                  | 53783       | 105.9         | 237              |
|                                              | Low                 | --                     | High, 10%                 | 53783       | 124.5         | 967              |
|                                              | High                | --                     | High, 10%                 | 53783       | 235.9         | 532              |
| CWT semiannual MDA, semiannual snail control | Low                 | Low, 50%               | --                        | 100900      | 82.3          | 1143             |
|                                              | High                | Low, 50%               | --                        | 100900      | 153.6         | 566              |
|                                              | Low                 | High, 85%              | --                        | 100900      | 57.5          | 1601             |
|                                              | High                | High, 85%              | --                        | 100900      | 102.7         | 816              |
|                                              | Low                 | --                     | None, 0%                  | 100900      | 41.5          | 1336             |
|                                              | High                | --                     | None, 0%                  | 100900      | 48.1          | 814              |
|                                              | Low                 | --                     | High, 10%                 | 100900      | 82.5          | 1120             |
|                                              | High                | --                     | High, 10%                 | 100900      | 153.5         | 572              |

The ICER is computed in reference to the next most effective, non-dominated strategy.

521  
 522  
 523  
 524  
 525  
 526  
 527  
 528  
 529  
 530

531 **Table S4: Parameter specifications for uncertainty analysis and generation of uncertainty**  
 532 **intervals**

| <b>Model parameter</b>                           | <b>Uncertainty analysis</b> |                    |                    |
|--------------------------------------------------|-----------------------------|--------------------|--------------------|
|                                                  | <b>Base case</b>            | <b>Lower limit</b> | <b>Upper limit</b> |
| Transmission model <sup>a</sup>                  | Mean                        | Lower 2.5%         | Upper 97.5%        |
| School-based delivery cost (per person)          | US\$ 0.50                   | US\$ 0.25          | US\$ 0.75          |
| Community-wide delivery cost (per person)        | US\$ 1.50                   | US\$ 0.50          | US\$ 2.50          |
| Snail control cost (per community)               | US\$ 379.43                 | US\$ 285           | US\$ 475           |
| Systematic non-compliance                        | 10%                         | 0%                 | 10%                |
| Schistosomiasis disability weight (light, heavy) | (0.014, 0.05)               | (0.01, 0.02)       | (0.02, 0.1)        |

533 <sup>a</sup>Sampled posterior distribution from Bayesian model fits.  
 534 We used a normal distribution to sample transmission trajectories, triangle distribution across all cost and disability  
 535 parameters, and simulated 10% of cases with perfect mixing (no systematic non-compliance).  
 536

537  
 538  
 539  
 540  
 541  
 542  
 543  
 544  
 545  
 546  
 547  
 548  
 549  
 550  
 551  
 552  
 553  
 554  
 555  
 556  
 557  
 558  
 559

560 **Table S5: Undiscounted costs, disability, and incremental cost-effectiveness of MDA, snail**  
 561 **control, and combined interventions for schistosomiasis in low and high burden Kenyan**  
 562 **communities**

| <b>Low prevalence communities</b>  | <b>MDA</b>     | <b>Snail control</b> | <b>Total cost (US\$)</b> | <b>Total disability (DALYs)</b> | <b>ICER (US\$/DALY)</b> |
|------------------------------------|----------------|----------------------|--------------------------|---------------------------------|-------------------------|
|                                    | None           | None                 | 0                        | 203.1                           | --                      |
|                                    | None           | Annual               | 3794                     | 148.4                           | 69                      |
|                                    | SBT annual     | None                 | 7455                     | 113.6                           | dominated <sup>a</sup>  |
|                                    | None           | Semiannual           | 7589                     | 110.2                           | 99                      |
|                                    | SBT semiannual | None                 | 14910                    | 97.2                            | dominated <sup>a</sup>  |
|                                    | SBT annual     | Annual               | 11249                    | 84.4                            | 142                     |
|                                    | SBT semiannual | Annual               | 18704                    | 74.6                            | dominated <sup>a</sup>  |
|                                    | SBT annual     | Semiannual           | 15044                    | 67.1                            | 220                     |
|                                    | SBT semiannual | Semiannual           | 22499                    | 59.1                            | 929                     |
|                                    | CWT, annual    | None                 | 53625                    | 49.4                            | dominated <sup>a</sup>  |
|                                    | CWT annual     | Annual               | 57419                    | 38.2                            | dominated <sup>a</sup>  |
|                                    | CWT annual     | Semiannual           | 61214                    | 33                              | 1484                    |
|                                    | CWT semiannual | None                 | 107250                   | 29.5                            | dominated <sup>a</sup>  |
|                                    | CWT semiannual | Annual               | 111040                   | 24.6                            | dominated <sup>a</sup>  |
|                                    | CWT semiannual | Semiannual           | 114840                   | 21.4                            | 4621                    |
| <b>High prevalence communities</b> | <b>MDA</b>     | <b>Snail control</b> | <b>Total cost (US\$)</b> | <b>Total disability (DALYs)</b> | <b>ICER (US\$/DALY)</b> |
|                                    | None           | None                 | 0                        | 651.2                           | --                      |
|                                    | None           | Annual               | 3794                     | 509.9                           | 27                      |
|                                    | SBT annual     | None                 | 7455                     | 411.6                           | dominated <sup>a</sup>  |
|                                    | None           | Semiannual           | 7589                     | 376.2                           | 28                      |
|                                    | SBT semiannual | None                 | 14910                    | 355.9                           | dominated <sup>a</sup>  |
|                                    | SBT annual     | Annual               | 11249                    | 298.5                           | 47                      |
|                                    | SBT semiannual | Annual               | 18704                    | 262.8                           | dominated <sup>a</sup>  |
|                                    | CWT, annual    | None                 | 53625                    | 235                             | dominated <sup>a</sup>  |
|                                    | SBT annual     | Semiannual           | 15044                    | 218.7                           | 48                      |
|                                    | SBT semiannual | Semiannual           | 22499                    | 188                             | 243                     |
|                                    | CWT annual     | Annual               | 57419                    | 156                             | dominated <sup>a</sup>  |
|                                    | CWT semiannual | None                 | 107250                   | 151.3                           | dominated <sup>a</sup>  |
|                                    | CWT annual     | Semiannual           | 61214                    | 119.2                           | 562                     |
|                                    | CWT semiannual | Annual               | 111040                   | 105.1                           | dominated <sup>a</sup>  |
|                                    | CWT semiannual | Semiannual           | 114840                   | 76.9                            | 1269                    |

563 This analysis assumed 10% systematic non-compliance without discounting. SBT, school-based treatment with  
 564 MDA; CWT, community-wide treatment with MDA.

565 <sup>a</sup>'dominated' strategy were (a) strictly dominated when they had a lower effectiveness and higher cost than another  
 566 choice; (b) dominated by extension when the strategy was less effective and had a higher ICER relative to another.

567 **Table S6: One-way sensitivity analysis varying cost estimates until key strategies are no**  
 568 **longer highly cost-effective.**

|                 |                | <b>Strategy</b>      |                                   | <b>Model parameter</b>              |  |
|-----------------|----------------|----------------------|-----------------------------------|-------------------------------------|--|
| <b>Setting</b>  | <b>MDA</b>     | <b>Snail control</b> | <b>School-based delivery cost</b> | <b>Community-wide delivery cost</b> |  |
| Base case       |                |                      | \$0.50                            | \$1.50                              |  |
| Low prevalence  | SBT semiannual | Semiannual           | \$0.85                            | --                                  |  |
| High prevalence | CWT annual     | Semiannual           | --                                | \$3.50                              |  |
| High prevalence | CWT semiannual | Semiannual           | --                                | \$1.75                              |  |

569  
 570  
 571  
 572  
 573
